# Supplementary material
Source: PubMed Central journal article supplement (PMC3033186)
Supplement: supp_ddq541_ddq541supp.pdf [file supp_ddq541_ddq541supp.pdf]

**Supplementary Table 1:** *Ank*<sup>+/+</sup> and *Ank*<sup>K1/K1</sup> mCOB cultures in osteogenic media for 7-9, 14 and 21days exhibit no difference in DNA content measured by PicoGreen assays.

| Days in osteogenic media | <i>Ank</i> <sup>+/+</sup> (μg DNA) | <i>Ank</i> <sup>K1/K1</sup> (μg DNA) | P value |
|--------------------------|------------------------------------|--------------------------------------|---------|
| 7-9                      | 7.23±0.73                          | 7.64±0.58                            | 0.49    |
| 14                       | 13.64±3.18                         | 12.41±3.51                           | 0.74    |
| 21                       | 8.55±1.17                          | 9.11±1.55                            | 0.64    |

Statistics were performed by *Student's t-test*.

**Supplementary Table 2: Gene expression in osteoblast cultures and in bone**

| <i>Fold-change in calvarial osteoblast cultures (mCOBs)</i>                                                                                                                                                                                                                 |                |                |              |                |
|-----------------------------------------------------------------------------------------------------------------------------------------------------------------------------------------------------------------------------------------------------------------------------|----------------|----------------|--------------|----------------|
| Genes                                                                                                                                                                                                                                                                       | D0             | D7             | D14          | D21            |
| <i>Tnap</i>                                                                                                                                                                                                                                                                 | 0.99 ± 0.09    | 0.82 ± 0.32    | 1.09 ± 0.18  | 0.71 ± 0.2     |
| <i>Ank</i>                                                                                                                                                                                                                                                                  | 1.21 ± 0.21    | 0.96 ± 0.04    | 1.3 ± 0.42   | 1.17 ± 0.32    |
| <i>Bsp</i>                                                                                                                                                                                                                                                                  | 0.74 ± 0.34    | 1.27 ± 0.13    | 1.23 ± 0.23  | 0.86 ± 0.33    |
| <i>Coll</i>                                                                                                                                                                                                                                                                 | 1.01 ± 0.05    | 1.06 ± 0.18    | 1.03 ± 0.22  | 0.77 ± 0.15    |
| <i>Enpp1</i>                                                                                                                                                                                                                                                                | 1.23 ± 0.5     | 1.01 ± 0.17    | 1.3 ± 0.41   | 1.31 ± 0.5     |
| <i>Mmp13</i>                                                                                                                                                                                                                                                                | 0.92 ± 0.21    | 0.95 ± 0.50    | 0.89 ± 0.10  | 0.74 ± 0.04**  |
| <i>Ocn</i>                                                                                                                                                                                                                                                                  | 0.92 ± 0.17    | 0.78 ± 0.49    | 0.73 ± 0.42  | 0.30 ± 0.23**  |
| <i>Sp7 (Osx)</i>                                                                                                                                                                                                                                                            | 0.85 ± 0.22    | 0.86 ± 0.14    | 1.16 ± 0.37  | 0.77 ± 0.07**  |
| <i>Runx2</i>                                                                                                                                                                                                                                                                | 1.21 ± 0.321   | 0.91 ± 0.20    | 1.02 ± 0.03  | 0.80 ± 0.08**  |
| <i>Phex</i>                                                                                                                                                                                                                                                                 | 0.64 ± 0.067*  | 0.75 ± 0.004*  | 0.72 ± 0.284 | 0.29 ± 0.203** |
| <i>Fold-change in whole bone (calvariae/femurs)</i>                                                                                                                                                                                                                         |                |                |              |                |
|                                                                                                                                                                                                                                                                             | Calvariae      | Femur          |              |                |
| <i>Coll</i>                                                                                                                                                                                                                                                                 | 0.78 ± 0.19    | 0.70 ± 0.08    |              |                |
| <i>Bsp</i>                                                                                                                                                                                                                                                                  | 0.86 ± 0.007*  | 0.71 ± 0.01    |              |                |
| <i>Mmp13</i>                                                                                                                                                                                                                                                                | 0.87 ± 0.26    | 0.42 ± 0.14    |              |                |
| <i>Ocn</i>                                                                                                                                                                                                                                                                  | 0.85 ± 0.29    | 0.57 ± 0.08    |              |                |
| <i>Opn</i>                                                                                                                                                                                                                                                                  | 0.95 ± 0.35    | 0.71 ± 0.12    |              |                |
| <i>Sp7 (Osx)</i>                                                                                                                                                                                                                                                            | 0.71 ± 0.24    | 0.63 ± 0.08    |              |                |
| <i>Runx2</i>                                                                                                                                                                                                                                                                | 0.80 ± 0.21    | 0.75 ± 0.21    |              |                |
| <i>Rankl</i>                                                                                                                                                                                                                                                                | 0.91 ± 0.37    | 0.89 ± 0.26    |              |                |
| <i>Opg</i>                                                                                                                                                                                                                                                                  | 0.93 ± 0.46    | 0.77 ± 0.37    |              |                |
| <i>Mcsf</i>                                                                                                                                                                                                                                                                 | 1.02 ± 0.27    | 0.73 ± 0.17    |              |                |
| <i>Fgf23</i>                                                                                                                                                                                                                                                                | 11.44 ± 5.412* | 8.39 ± 1.223** |              |                |
| <i>Dmp1</i>                                                                                                                                                                                                                                                                 | 3.10 ± 1.337*  | 1.44 ± 0.836   |              |                |
| <i>Mepe</i>                                                                                                                                                                                                                                                                 | 1.80 ± 0.617*  | 0.30 ± 0.09*   |              |                |
| <i>Phex</i>                                                                                                                                                                                                                                                                 | 1.88 ± 0.88    | 0.50 ± 0.18    |              |                |
| Fold-change of gene expression ( <i>Ank</i> <sup>KI/KI</sup> divided by <i>Ank</i> <sup>+/+</sup> ) at each time point determined by qPCR. Gene expression was normalized to 18S RNA. <i>Ank</i> <sup>+/+</sup> day 0 samples were used as calibrators (*p<0.05, **p<0.01). |                |                |              |                |

**Supplementary Table 3:  $\mu$ CT analysis of  $Ank^{+/+}$  and  $Ank^{KI/KI}$  male mice receiving bone marrow transplantation**

| Donor $\rightarrow$ Recipient             | $Ank^{+/+} \rightarrow$<br>$Ank^{+/+}$ (n=8) | $Ank^{KI/KI} \rightarrow$<br>$Ank^{KI/KI}$ (n=6) | $Ank^{+/+} \rightarrow$<br>$Ank^{KI/KI}$ (n=8) | $Ank^{KI/KI} \rightarrow$<br>$Ank^{+/+}$ (n=6) |
|-------------------------------------------|----------------------------------------------|--------------------------------------------------|------------------------------------------------|------------------------------------------------|
| <b>Calvariae</b>                          |                                              |                                                  |                                                |                                                |
| Cortical width (mm)                       | 0.10 $\pm$ 0.01                              | 0.15 $\pm$ 0.01*                                 | 0.14 $\pm$ 0.18                                | 0.12 $\pm$ 0.06                                |
| BM/TA (%)                                 | 5.4 $\pm$ 1.76                               | 0.7 $\pm$ 0.6**                                  | 0.7 $\pm$ 0.6**                                | 1.8 $\pm$ 1.39**                               |
| BA/TA (%)                                 | 95.2 $\pm$ 2.39                              | 99.4 $\pm$ 0.6**                                 | 99.3 $\pm$ 0.6**                               | 98.2 $\pm$ 1.3**                               |
| <b>Mandible</b>                           |                                              |                                                  |                                                |                                                |
| BVF (%)                                   | 79.3 $\pm$ 1.43                              | 87.3 $\pm$ 2.23**                                | 79.5 $\pm$ 5.09 <sup>a</sup>                   | 81.8 $\pm$ 4.13 <sup>a</sup>                   |
| <b>Femur trabecular bone (metaphyses)</b> |                                              |                                                  |                                                |                                                |
| BVF (%)                                   | 7.46 $\pm$ 5.16                              | 5.97 $\pm$ 1.25                                  | 5.69 $\pm$ 1.53                                | 7.67 $\pm$ 4.61                                |
| Trabecular number(N/mm)                   | 3.77 $\pm$ 0.43                              | 4.23 $\pm$ 0.35                                  | 4.09 $\pm$ 0.47                                | 4.03 $\pm$ 0.56                                |
| Trabecular thickness ( $\mu$ m)           | 39.7 $\pm$ 7.10                              | 38.3 $\pm$ 1.91                                  | 38.3 $\pm$ 2.54                                | 44.37 $\pm$ 8.19                               |
| Trabecular Spacing ( $\mu$ m)             | 268 $\pm$ 39.4                               | 237 $\pm$ 21.7                                   | 246 $\pm$ 29.5                                 | 252 $\pm$ 33.7                                 |
| <b>Femur trabecular bone (diaphyses)</b>  |                                              |                                                  |                                                |                                                |
| Bone volume (mm <sup>3</sup> )            | 0.003 $\pm$ 0.003                            | 0.204 $\pm$ 0.082**                              | 0.086 $\pm$ 0.085 <sup>a</sup>                 | 0.01 $\pm$ 0.017 <sup>a</sup>                  |
| BV/TV (BVF%)                              | 0.14 $\pm$ 0.142                             | 4.172 $\pm$ 1.78**                               | 1.99 $\pm$ 1.961 <sup>a</sup>                  | 0.49 $\pm$ 0.907 <sup>a</sup>                  |
| <b>Femur cortical bone (diaphyses)</b>    |                                              |                                                  |                                                |                                                |
| Subperiosteal area (mm <sup>2</sup> )     | 1.48 $\pm$ 0.19                              | 2.24 $\pm$ 0.37**                                | 2.29 $\pm$ 0.20**                              | 1.57 $\pm$ 0.30 <sup>ab</sup>                  |
| Subendosteal area (mm <sup>2</sup> )      | 0.71 $\pm$ 0.14                              | 1.37 $\pm$ 0.27**                                | 1.36 $\pm$ 0.18**                              | 0.84 $\pm$ 0.24 <sup>ab</sup>                  |
| Cortical porosity (%)                     | 0.32 $\pm$ 0.27                              | 2.98 $\pm$ 1.60**                                | 3.07 $\pm$ 1.24**                              | 0.85 $\pm$ 1.59 <sup>ab</sup>                  |
| Tissue density (mg/cm <sup>3</sup> HA)    | 1221 $\pm$ 13.94                             | 1166 $\pm$ 24.06**                               | 1168 $\pm$ 18.92**                             | 1217 $\pm$ 34.15 <sup>ab</sup>                 |

BM: calvarial total bone marrow space; BA: calvarial bone area; TA: calvarial total area; BV: bone volume; TV: total volume; BVF: BV/TV.

Data are mean $\pm$ SD. \* p<0.05, \*\* p<0.01 \*: Significant difference compared to  $Ank^{+/+} \rightarrow Ank^{+/+}$  group  
a: significant difference compared to  $Ank^{KI/KI} \rightarrow Ank^{KI/KI}$  group; b: significant difference compared to  $Ank^{+/+} \rightarrow Ank^{KI/KI}$  group

## FIGURE LEGENDS

**Supplementary Figure 1.** Extracellular pyrophosphate (ePPi) assays in *Ank*<sup>+/+</sup> and *Ank*<sup>KI/KI</sup> day-14 and day-21 mCOB cultures. *Student's t-test* shows no significant differences between two groups at either time points.

**Supplementary Figure 2.** (A) Expression analysis of *Ank* in RAW 264.7 cells, sorted osteoclasts and bone marrow-derived macrophages (BMM) by RT-PCR. RANKL (30ng/ml; R&D system) was used to stimulate osteoclast differentiation. Cells grown in medium without RANKL treatment remain osteoclast precursors. GAPDH served as loading control. (B) Representative plots of sorted CD11b<sup>-low</sup>CD45R<sup>-</sup>CD3<sup>-</sup> (triple negative population, TN) in the context of C-fms (CD115) and C-kit (CD117) from freshly isolated *Ank*<sup>+/+</sup> and *Ank*<sup>KI/KI</sup> bone marrow cells. The P6 population (CD11b<sup>-low</sup>CD45R<sup>-</sup>CD3<sup>-</sup> C-fms/CD115<sup>high</sup>C-kit/CD117<sup>high</sup>) contains mostly cells with osteoclastogenic activity (Jacquin et al., 2006). No significant difference in the ratio of P6 cells to TN population was found between *Ank*<sup>+/+</sup> and *Ank*<sup>KI/KI</sup> bone marrow (p=0.611). Data shown are mean ± SD from three independent experiments.

**Supplementary Figure 3.** (A) qPCR gene expression analysis of *Mcsf*, *Rankl* and *Opg* in *Ank*<sup>+/+</sup> and *Ank*<sup>KI/KI</sup> mCOBs in differentiation media for 7 and 14 days. Expression levels of genes of interest were normalized to 18S RNA. *Ank*<sup>+/+</sup> day 7 samples were used as calibrators. No significant difference in the levels of *Mcsf*, *Rankl* and *Opg* was found between *Ank*<sup>+/+</sup> and *Ank*<sup>KI/KI</sup> cultures. (B) RANKL concentration in conditioned media from mouse calvarial osteoblast (mCOB) and bone marrow-derived macrophage (BMM) cocultures was measured by ELISA (Mouse TRANCE/RANK Ligand/TNFSF 11 Immunoassay, Quantikine, R&D System). Media were changed every three days and conditioned media were collected from mCOB- BMM cocultures at day 9. No significant difference was found among four groups. Statistics performed

by one-way ANOVA. (C) Resorption assay evaluated after 12 days of plating mCOB-BMM cocultures on calcium-phosphate coated slides. *Ank*<sup>KI/KI</sup>mCOB- *Ank*<sup>KI/KI</sup>BMM cocultures with or without RANKL treatment (0, 10 or 30 ng/ml) resorbed significantly less mineral than *Ank*<sup>+/+</sup>mCOB-*Ank*<sup>+/+</sup>BMM cocultures (\* p<0.01 shown by one-way ANOVA). No significant difference was seen in the *Ank*<sup>KI/KI</sup>mCOB- *Ank*<sup>KI/KI</sup>BMM cocultures with or without RANKL treatment.

**Supplementary Fig.1**

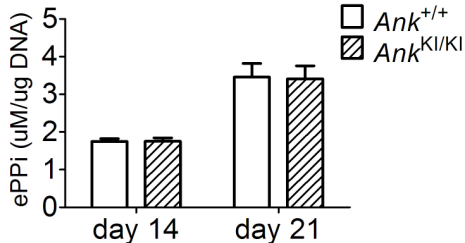

**Supplementary Fig. 2**

**A**

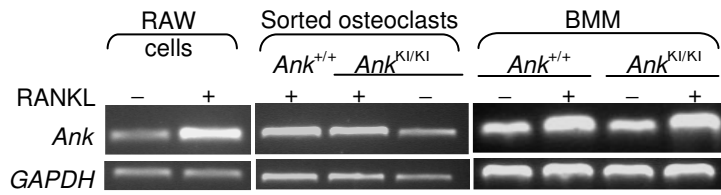

**B**

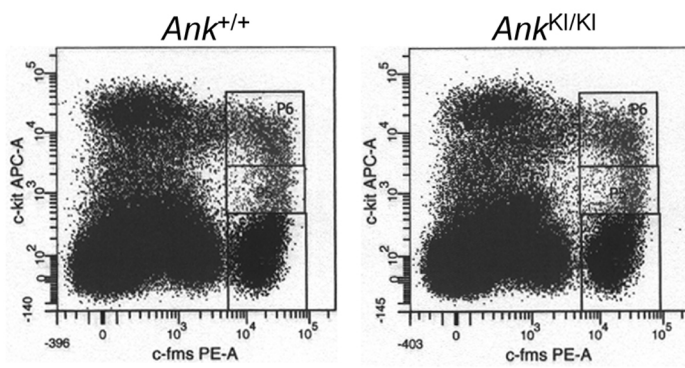

|               | <i>Ank</i> <sup>+/+</sup> | <i>Ank</i> <sup>KI/KI</sup> |
|---------------|---------------------------|-----------------------------|
| % of P6 in TN | 1.43 ± 0.40               | 1.56 ± 0.11                 |

### Supplementary Fig. 3

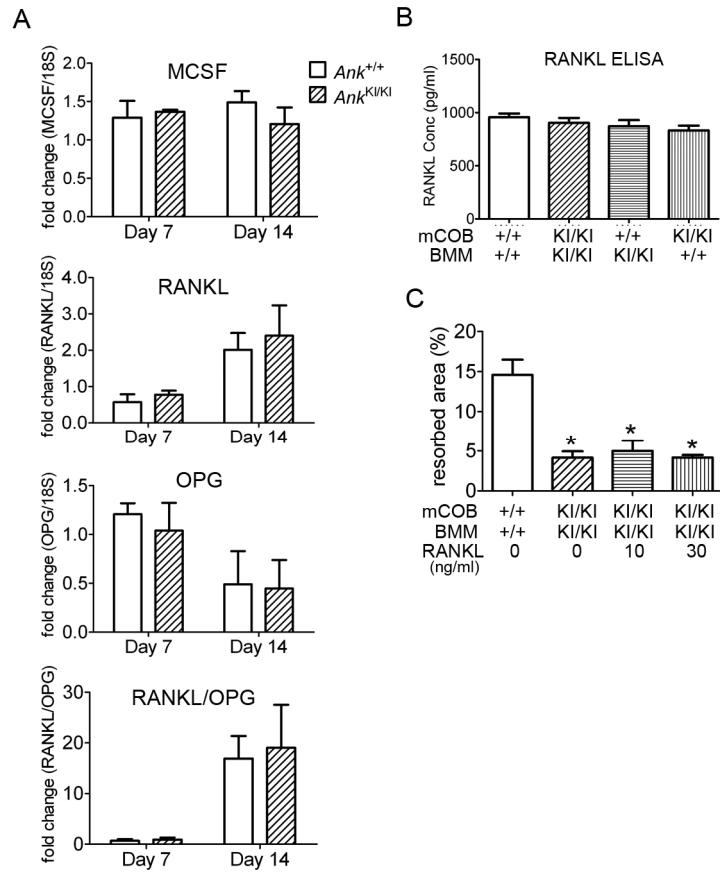



References:

Jacquin, C., Gran, D.E., Lee, S.K., Lorenzo, J.A., and Aguila, H.L. (2006). Identification of multiple osteoclast precursor populations in murine bone marrow. *J. Bone Miner. Res.* **21**, 67-77.
